# Supplementary material for: Comparison of Carbon Footprint Differences in Nitrogen Reduction and Density Increase in Double Cropping Rice under Two Evaluation Methods
Source: MDPI journal article supplement (doi:10.3390/agronomy14040803), 2024-04-12
Supplement: s1 [file s1]

## Supplementary Materials

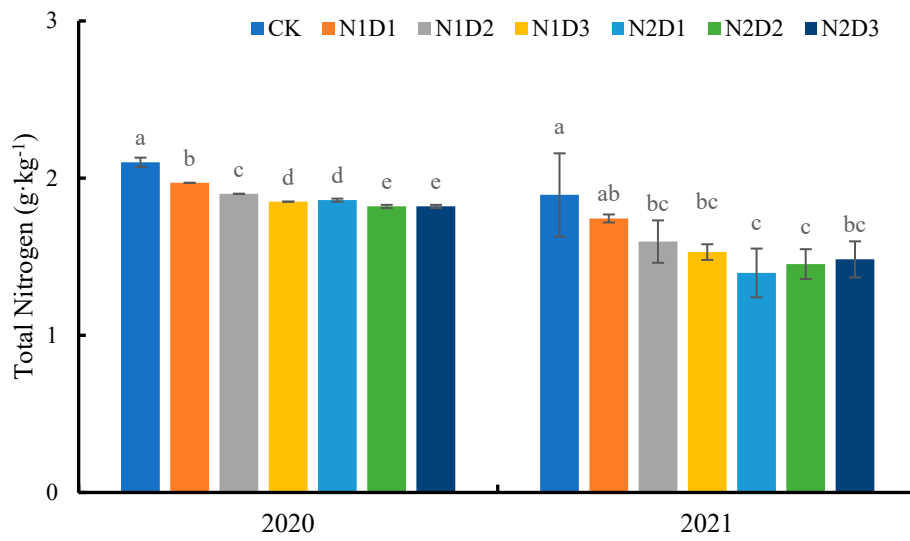

**Supplementary Figure S1.** Total nitrogen content in 0-20cm soil layer during late rice season in 2020 and 2021. Note: The vertical line on the broken line represents the standard error(n = 3). Different lowercase letters indicate significant differences between early, late rice seasons and the annual year at  $p < 0.05$ .
